# Supplementary material
Source: PubMed Central journal article supplement (PMC8130598)
Supplement: NIHMS1645732-supplement-3.pdf [file NIHMS1645732-supplement-3.pdf]

## Supplementary Tables

**Supplementary Table 1:** List of primary antibodies used for western blot

| <b>Primary Antibody</b>              | <b>Clone</b> | <b>Company</b> | <b>Catalogue number</b> | <b>Clonality</b> | <b>species</b> | <b>Dilution</b> |
|--------------------------------------|--------------|----------------|-------------------------|------------------|----------------|-----------------|
| <b>ATG-5</b>                         | 177.19       | Biologend      | 847402                  | monoclonal       | Mouse          | 1:1000          |
| <b>Beclin-1</b>                      | O93F3        | Biologend      | 849702                  | monoclonal       | Rabbit         | 1:1000          |
| <b>GAPDH</b>                         | D16H11       | Cell Signaling | 5174S                   | monoclonal       | Rabbit         | 1:5000          |
| <b>LC3 A/B</b>                       | D3U4C        | Cell Signaling | 12741S                  | monoclonal       | Rabbit         | 1:1000          |
| <b>SQTM-1/P-62</b>                   | N/A          | Sigma Aldrich  | P0067-200UL             | polyclonal       | Rabbit         | 1:1000          |
| <b>VPS-34 (PI3 Kinase Class III)</b> | D9A5         | Cell Signaling | 4263S                   | monoclonal       | Rabbit         | 1:1000          |
