# Supplementary material
Source: PubMed Central journal article supplement (PMC8130598)
Supplement: NIHMS1645732-supplement-4.pdf [file NIHMS1645732-supplement-4.pdf]

**Supplementary Table 2:** List of genes included in the Human Autophagy Primer Library

| Symbol          | Name                                               | Symbol              | Name                                                      |
|-----------------|----------------------------------------------------|---------------------|-----------------------------------------------------------|
| <i>AKT1S1</i>   | AKT1 substrate 1 (proline-rich)                    | <i>LAMP2</i>        | Lysosomal-associated membrane protein 2                   |
| <i>AMBRA1</i>   | Autophagy/beclin-1 regulator 1                     | <i>LAMP3</i>        | Lysosomal-associated membrane protein 3                   |
| <i>APOLI</i>    | Apolipoprotein L, 1                                | <i>LETM1</i>        | Leucine zipper-EF-hand containing transmembrane protein 1 |
| <i>ATF4</i>     | Activating transcription factor 4                  | <i>LETM2</i>        | Leucine zipper-EF-hand containing transmembrane protein 2 |
| <i>ATG10</i>    | ATG10 autophagy related 10 homolog (S. cerevisiae) | <i>MAP1LC3A</i>     | Microtubule-associated protein 1 light chain 3 alpha      |
| <i>ATG12</i>    | ATG12 autophagy related 12 homolog (S. cerevisiae) | <i>MAP1LC3 A/B</i>  | Microtubule-associated protein 1 light chain 3 beta       |
| <i>ATG16L1</i>  | ATG16 autophagy related 16-like 1 (S. cerevisiae)  | <i>MAP1LC3 A/B2</i> | Microtubule-associated protein 1 light chain 3 beta 2     |
| <i>ATG16L2</i>  | ATG16 autophagy related 16-like 2 (S. cerevisiae)  | <i>MAP1LC3C</i>     | Microtubule-associated protein 1 light chain 3 gamma      |
| <i>ATG2A</i>    | ATG2 autophagy related 2 homolog A (S. cerevisiae) | <i>MCL1</i>         | Myeloid cell leukemia sequence 1 (BCL2-related)           |
| <i>ATG2B</i>    | ATG2 autophagy related 2 homolog B (S. cerevisiae) | <i>PIK3C3</i>       | Phosphoinositide-3-kinase, class 3                        |
| <i>ATG3</i>     | ATG3 autophagy related 3 homolog (S. cerevisiae)   | <i>PIK3R4</i>       | Phosphoinositide-3-kinase, regulatory subunit 4           |
| <i>ATG4A</i>    | ATG4 autophagy related 4 homolog A (S. cerevisiae) | <i>PPMIK</i>        | Protein phosphatase 1K (PP2C domain containing)           |
| <i>ATG4B</i>    | ATG4 autophagy related 4 homolog B (S. cerevisiae) | <i>RAPTOR</i>       | Raptor                                                    |
| <i>ATG4C</i>    | ATG4 autophagy related 4 homolog C (S. cerevisiae) | <i>RASD1</i>        | RAS, dexamethasone-induced 1                              |
| <i>ATG4D</i>    | ATG4 autophagy related 4 homolog D (S. cerevisiae) | <i>RB1CC1</i>       | RB1-inducible coiled-coil 1                               |
| <i>ATG5</i>     | ATG5 autophagy related 5 homolog (S. cerevisiae)   | <i>RGS19</i>        | Regulator of G-protein signaling 19                       |
| <i>ATG7</i>     | ATG7 autophagy related 7 homolog (S. cerevisiae)   | <i>RICTOR</i>       | Rapamycin-insensitive companion of mTOR                   |
| <i>ATG9A</i>    | ATG9 autophagy related 9 homolog A (S. cerevisiae) | <i>SEC16A</i>       | SEC16 homolog A (S. cerevisiae)                           |
| <i>BARKOR</i>   | BARKOR (KIAA0831)                                  | <i>SEC16B</i>       | SEC16 homolog B (S. cerevisiae)                           |
| <i>BAX</i>      | BCL2-associated X protein                          | <i>SEC23A</i>       | Sec23 homolog A (S. cerevisiae)                           |
| <i>BCL2</i>     | B-cell CLL/lymphoma 2                              | <i>SEC23B</i>       | Sec23 homolog B (S. cerevisiae)                           |
| <i>BCL2L1</i>   | BCL2-like 1                                        | <i>SEC24A</i>       | SEC24 related gene family, member A (S. cerevisiae)       |
| <i>BECLIN-1</i> | Beclin-1                                           | <i>SEC24B</i>       | SEC24 related gene family, member B (S. cerevisiae)       |
| <i>BECN1L1</i>  | Becn1L1                                            | <i>SEC24C</i>       | SEC24 related gene family, member C (S. cerevisiae)       |
| <i>BIRC5</i>    | Effector cell peptidase receptor 1                 | <i>SEC24D</i>       | SEC24 related gene family, member D (S. cerevisiae)       |

|                         |                                                                                         |                       |                                                          |
|-------------------------|-----------------------------------------------------------------------------------------|-----------------------|----------------------------------------------------------|
| <b><i>BNIP3</i></b>     | BCL2/adenovirus E1B 19kDa interacting protein 3                                         | <b><i>SH3GLB1</i></b> | SH3-domain GRB2-like endophilin B1                       |
| <b><i>DDIT3</i></b>     | DNA-damage-inducible transcript 3                                                       | <b><i>SH3GLB2</i></b> | SH3-domain GRB2-like endophilin B2                       |
| <b><i>DRAM</i></b>      | Damage-regulated autophagy modulator                                                    | <b><i>SNX30</i></b>   | Sorting nexin family member 30                           |
| <b><i>EIF4EBP1</i></b>  | Eukaryotic translation initiation factor 4E binding protein 1                           | <b><i>SQSTM1</i></b>  | Sequestosome 1                                           |
| <b><i>EIF4EBP2</i></b>  | Eukaryotic translation initiation factor 4E binding protein 2                           | <b><i>TP53</i></b>    | Tumor protein p53                                        |
| <b><i>EIF4G1</i></b>    | Eukaryotic translation initiation factor 4 gamma, 1                                     | <b><i>TP73</i></b>    | Tumor protein p73                                        |
| <b><i>EPS15L1</i></b>   | Epidermal growth factor receptor pathway substrate 15-like 1                            | <b><i>TPR</i></b>     | Translocated promoter region (to activated MET oncogene) |
| <b><i>FKBP15</i></b>    | FK506 binding protein 15, 133kDa                                                        | <b><i>ULK1</i></b>    | Unc-51-like kinase 1 (C. elegans)                        |
| <b><i>FRAP1</i></b>     | FK506 binding protein 12-rapamycin associated protein 1                                 | <b><i>ULK2</i></b>    | Unc-51-like kinase 2 (C. elegans)                        |
| <b><i>FRS2</i></b>      | Fibroblast growth factor receptor substrate 2                                           | <b><i>ULK3</i></b>    | Unc-51-like kinase 3 (C. elegans)                        |
| <b><i>FRS3</i></b>      | Fibroblast growth factor receptor substrate 3                                           | <b><i>ULK4</i></b>    | Unc-51-like kinase 4 (C. elegans)                        |
| <b><i>GABARAP</i></b>   | GABA(A) receptor-associated protein                                                     | <b><i>UVRAG</i></b>   | UV radiation resistance associated gene                  |
| <b><i>GABARAPL1</i></b> | GABA(A) receptor-associated protein like 1                                              | <b><i>WDR45L</i></b>  | WDR45-like                                               |
| <b><i>GABARAPL2</i></b> | GABA(A) receptor-associated protein-like 2                                              | <b><i>WIP1I</i></b>   | WD repeat domain, phosphoinositide interacting 1         |
| <b><i>GBL</i></b>       | G protein beta subunit-like                                                             | <b><i>WIP12</i></b>   | WD repeat domain, phosphoinositide interacting 2         |
| <b><i>GFI1B</i></b>     | Growth factor independent 1B transcription repressor                                    | <b><i>Actb</i></b>    | Actin, beta                                              |
| <b><i>GNAI3</i></b>     | Guanine nucleotide binding protein (G protein), alpha inhibiting activity polypeptide 3 | <b><i>B2m</i></b>     | Beta-2-microglobulin                                     |
| <b><i>GPSM1</i></b>     | G-protein signaling modulator 1 (AGS3-like, C. elegans)                                 | <b><i>Gapd</i></b>    | Glyceraldehyde phosphate dehydrogenase                   |
| <b><i>GPSM2</i></b>     | G-protein signaling modulator 2 (AGS3-like, C. elegans)                                 | <b><i>Gusb</i></b>    | Glucuronidase, beta                                      |
| <b><i>GPSM3</i></b>     | G-protein signaling modulator 3 (AGS3-like, C. elegans)                                 | <b><i>Hprt1</i></b>   | Hypoxanthine phosphoribosyltransferase 1                 |
| <b><i>HIF1A</i></b>     | Hypoxia inducible factor 1, alpha                                                       | <b><i>Pgk1</i></b>    | Phosphoglycerate kinase 1                                |
| <b><i>HSPA5</i></b>     | Heat shock 70kDa protein 5                                                              | <b><i>Ppia</i></b>    | Peptidylprolyl isomerase A                               |
| <b><i>LAMP1</i></b>     | Lysosomal-associated membrane protein 1                                                 | <b><i>Rpl13a</i></b>  | Ribosomal protein L13a                                   |
