# Supplementary material
Source: PubMed Central journal article supplement (PMC8130598)
Supplement: NIHMS1645732-supplement-6.pdf [file NIHMS1645732-supplement-6.pdf]

**Supplementary Table 4:** List of genes studied from Transcriptome data for autophagy in humans.

|                |                 |                    |               |                 |
|----------------|-----------------|--------------------|---------------|-----------------|
| <i>ACTB</i>    | <i>BAX</i>      | <i>GABARAP1</i>    | <i>MTOR</i>   | <i>SEC24D</i>   |
| <i>AKT1S1</i>  | <i>BCL2</i>     | <i>GABARAP2</i>    | <i>PGK1</i>   | <i>SH3GLB1</i>  |
| <i>AKT1S1</i>  | <i>BCL2L1</i>   | <i>GAPDH</i>       | <i>PIK3CA</i> | <i>SH3GLB2</i>  |
| <i>AMBRA1</i>  | <i>BECN1</i>    | <i>GFI1B</i>       | <i>PIK3R4</i> | <i>SNORD33</i>  |
| <i>APOB</i>    | <i>BIRC5</i>    | <i>GNAI3</i>       | <i>PPM1K</i>  | <i>SNORD97;</i> |
| <i>ATG14</i>   | <i>BNIP3</i>    | <i>GPSM1</i>       | <i>RASD1</i>  | <i>SNX30</i>    |
| <i>ATG16L1</i> | <i>BNIP3L</i>   | <i>GPSM2</i>       | <i>RB1CC1</i> | <i>SQSTM1</i>   |
| <i>ATG16L2</i> | <i>C22orf29</i> | <i>GPSM3</i>       | <i>RICTOR</i> | <i>SQSTM1</i>   |
| <i>ATG2A</i>   | <i>DDIT3</i>    | <i>GUSB</i>        | <i>RICTOR</i> | <i>TP53</i>     |
| <i>ATG2B</i>   | <i>DRAM1</i>    | <i>HIF1A</i>       | <i>RP11</i>   | <i>TP73</i>     |
| <i>ATG3</i>    | <i>DRAM2</i>    | <i>HPRT1</i>       | <i>RPL13</i>  | <i>TPR</i>      |
| <i>ATG4A</i>   | <i>EIF4EBP1</i> | <i>HSPA5</i>       | <i>RPL13A</i> | <i>ULK1</i>     |
| <i>ATG4B</i>   | <i>EIF4EBP2</i> | <i>LAMP1</i>       | <i>RPTOR</i>  | <i>ULK2</i>     |
| <i>ATG4C</i>   | <i>EIF4G1</i>   | <i>LAMP2</i>       | <i>SEC16A</i> | <i>ULK3</i>     |
| <i>ATG4D</i>   | <i>EIF4G2;</i>  | <i>LAMP3</i>       | <i>SEC16B</i> | <i>ULK4</i>     |
| <i>ATG5</i>    | <i>EPS15L1</i>  | <i>LETM1</i>       | <i>SEC23A</i> | <i>UVRAG</i>    |
| <i>ATG7</i>    | <i>FKBP15</i>   | <i>LETM2</i>       | <i>SEC23B</i> | <i>UVRAG</i>    |
| <i>ATG9A</i>   | <i>FRS2</i>     | <i>MAP1LC3A</i>    | <i>SEC24A</i> | <i>WDR45</i>    |
| <i>ATG9B</i>   | <i>FRS3</i>     | <i>MAP1LC3 A/B</i> | <i>SEC24B</i> | <i>WIPI1</i>    |
| <i>B2M</i>     | <i>GABARAP</i>  | <i>MCL1</i>        | <i>SEC24C</i> | <i>WIPI2</i>    |
